# Robust candidates for language development and evolution are significantly dysregulated in the blood of people with Williams syndrome

Antonio Benítez-Burraco<sup>1</sup> and Ryo Kimura<sup>2</sup>

1. Department of Spanish, Linguistics, and Theory of Literature, Faculty of Philology, University of Seville, Seville, Spain

2. Department of Anatomy and Developmental Biology, Graduate School of Medicine, Kyoto University, Kyoto, Japan

## Abstract

Williams syndrome (WS) is a clinical condition entailing cognitive deficits and with an uneven language profile, which has been object of intense inquiry over the last decades. Although WS results from the hemideletion of around two dozens of genes in chromosome 7, no gene has been yet probed to account for, or contribute significantly to, the language problems exhibited by the affected people. In this paper we show that robust candidates for language disorder and for language evolution in the species, located outside the hemideleted region, are up- or downregulated in the blood of subjects with WS. Most of these genes play a role in the development and function of brain areas involved in language processing, which exhibit structural and functional anomalies in people with the condition. Overall, these genes emerge as robust candidates for language dysfunction in WS.

Keywords: Williams syndrome; blood transcriptional profile; language disorders; language evolution

## Introduction

Williams syndrome (WS) is a clinical condition resulting from a hemizygous deletion of 1.5 to 1.8 Mb on 7q11.23, which affects to nearly 30 genes (Korenberg et al., 2000; Pober, 2010). The affected people exhibit a distinctive behavioral and cognitive profile, with enhanced sociability, mental retardation, impaired spatial cognition, and spared musical abilities (Reilly et al., 1990; Udwin and Yule, 1991; Bellugi et al., 1999; Galaburda et al., 2002; Levitin et al., 2005). Language abilities are significantly preserved in people with WS compared to other neurodevelopmental disorders, although they are delayed or impaired across different levels compared to the neurotypical population (Karmiloff-Smith and Mills, 2006; Brock, 2007; Mervis and Becerra, 2007; Martens et al., 2008 for good reviews). Children with WS experience problems mostly with irregular forms and complex syntax; conversely, they usually excel on expressive vocabulary (including semantic organization and fluency), although they have problems with word definitions (Volterra et al., 1996; Mervis et al., 1999; Purser et al., 2011; Van Den Heuvel et al., 2016; see Mervis and Becerra 2007 for discussion). Nonetheless, as with other aspects of the cognitive profile of this condition, no robust gene-to-phenotype associations have been established in the language domain. To date, the most promising candidates for language dysfunction in WS are *GTF2I*, *BAZ1B*, and *LIMK1*. In particular, *GTF2I*, which encodes a regulator of transcription, has been repeatedly related to the behavioral and cognitive disabilities that are typically found in this condition and that have an impact on language function (Morris et al., 2003; Tassabehji et al., 2005; Sakura et al., 2011; Hoeft et al., 2014). The gene has been associated to autism spectrum disorder (ASD) too (Malenfant et al. 2012). Its adjacent paralog, *GTF2IRD1*, has been related to altered vocalizations, among other features (Howard et al., 2012). Interestingly too, *BAZ1B* haploinsufficiency explains almost 50% of transcriptional dysregulation in WS neurons, with *BAZ1B* target genes being enriched in functions related to neurogenesis and neuron differentiation (Lalli et al., 2016). Regarding *LIMK1*, it regulates synaptic plasticity and long-term memory (Todorovski et al. 2015), and its hemideletion has been hypothesized to account for the deficits in spatial cognition in combination with other genes (Gray et al., 2006; Smith et al., 2009). Still, these links are quite vague, if one considers our remarkable understanding of the genetic underpinnings of human language, language disorders, and language evolution (see Scharff and White, 2004; Li and Barlett, 2012; Benítez-Burraco, 2013; Graham et al., 2015; Fisher, 2017; Murphy

and Benítez-Burraco, 2017; 2018 for reviews). Examining how these robust candidates for language dysfunction and evolution behave in WS should help refine our view of the molecular causes of language dysfunction in this condition. One general reason is the deep link that exists between evolution and (abnormal) development, in the spirit of evo-devo theories. One particular reason is that although in this condition the number of hemideleted genes is quite reduced, changes in the dosage of hundreds or even thousands of other genes can be expected, with a potential impact on language abilities. Recently Kimura and colleagues (2018) confirmed that the dysregulation of several co-expression modules involving dozens of genes outside of the 7q11.23 region seemingly accounts for the complex phenotypes observed in WS patients. Importantly, they found *BCL11A*, a gene associated with speech disorders, among the hub genes in the top WS-related modules.

In this paper we conduct a more focused research on the potential dysregulation of genes related to language outside the WS region as a possible explanation of the distinctive language profile of the affected people. We found that significant differences exist in the blood of subjects with WS compared to neurotypical controls in the expression levels of robust candidates for language evolution and development.

## Method

The list of core candidates for language (abnormal) development and language evolution (Supplemental table 1) encompasses two subsets of genes. The first subset consists of strong candidates for language disorders, in particular, dyslexia and specific language disorder (SLI), as listed by Paracchini and colleagues (2016), Pettigrew and colleagues (2016) and Chen and colleagues (2017). The second subset consists on strong candidates for language evolution, as compiled by Boeckx and Benítez-Burraco (2014a; 2014b) and Benítez-Burraco and Boeckx (2015). These are genes involved in the globularization of the human skull/brain and the cognitive changes accounting for our species-specific ability to learn and use languages (aka our *language-readiness*), and fulfil the following criteria: they have changed (and/or interact with genes that have changed) after our split from Neanderthals/Denisovans (including changes in their coding regions and/or their epigenetic profile); they play some known role in brain development, regionalization, wiring, and/or function; and/or they are candidates for language dysfunction in broad cognitive disorders, particularly, ASD and schizophrenia (SZ) (see Benítez-Burraco and Murphy, 2016; Murphy and Benítez-Burraco, 2016; 2017 for details about their role in language processing).

The gene expression profiling data of peripheral blood in patients with WS was obtained from Gene Expression Omnibus (GSE 89594). The Benjamini-Hochberg method (Benjamini and Hochberg, 1995) was used to calculate the false discovery rate (FDR). Genes were considered to be differentially expressed genes (DEG) when the  $FDR < 0.05$  and the  $|\text{fold change (FC)}| > 1.2$ . Statistical overrepresentation was evaluated using Fisher's exact test.

## Results

We found that candidates for language (abnormal) development and language evolution are significantly dysregulated in the blood of subjects with WS ( $p=1.1e-7$  by Fisher's exact test). Table 1 shows the genes that are significantly up- or down-regulated compared to controls ( $FDR < 0.05$ ,  $|\text{FC}| > 1.2$ ).

| Gene name      | logFC  | FDR Pvalue |
|----------------|--------|------------|
| <i>PVALB</i>   | -0,651 | 1,65E-03   |
| <i>DOCK4</i>   | -0,500 | 2,00E-03   |
| <i>NFXL1</i>   | -0,447 | 7,77E-03   |
| <i>ZNF385D</i> | -0,424 | 6,59E-06   |
| <i>DUSP1</i>   | -0,380 | 6,66E-03   |
| <i>CEP63</i>   | -0,370 | 3,43E-05   |

|               |        |          |
|---------------|--------|----------|
| <i>PAX3</i>   | -0,348 | 4,13E-02 |
| <i>ITGB4</i>  | -0,298 | 7,37E-03 |
| <i>PLAUR</i>  | -0,295 | 4,88E-02 |
| <i>FGFR1</i>  | 0,286  | 7,44E-03 |
| <i>SETBP1</i> | 0,299  | 1,93E-03 |
| <i>SIX3</i>   | 0,310  | 1,55E-03 |

Table 1. Genes that are significantly dysregulated in the blood of subjects with WS (FDR <0.05, |FC| > 1.2).

In order to check the specificity of this set of genes in relation to language we conducted a functional enrichment analysis with Enrichr ([amp.pharm.mssm.edu/Enrichr](http://amp.pharm.mssm.edu/Enrichr); Chen et al., 2013; Kuleshov et al., 2016). Our results (Supplemental table 2) show that the dysregulated genes mainly contribute to the cytoskeleton activity and are significantly involved in cell proliferation and migration, including neuroblast proliferation. Regarding their molecular function, they typically participate in protein modification, particularly via (tyrosine) kinase phosphatase and (tyrosine) kinase binding activities, but also in gene regulation, via transcription cofactor binding. Interestingly, these genes are significantly associated to aberrant processes impacting on brain development, like abnormal neural tube morphology and neural crest cell migration, as well as decreased forebrain size and abnormal midbrain development. Likewise, they are associated to clinical symptoms mostly impacting on craniofacial morphology, like malar flattening, midface retrusion, shallow orbits, or depressed nasal bridge. Finally, these genes are predicted to be preferentially expressed in the ectoderm, the cranium, the retina, and the neural crest. According to the Human Brain Transcriptome Database (<http://hbatlas.org>) all these genes are expressed in the brain, particularly in the thalamus and the cerebellum (see Supplemental table 3). The thalamus functions as a sort of relay center to connect many brain areas involved in language processing (Wahl et al., 2008; Murdoch, 2010; David et al., 2011) and changes in the thalamus have been claimed to contribute to the evolutionary emergence of our language-ready brain (see Boeckx and Benítez-Burraco, 2014a for details). Similarly, the cerebellum plays a key role in language processing and is impaired in language-related pathologies (Vias and Dick, 2017; Mariën and Borgatti 2018). People with WS exhibit cerebellar volume alterations that are seemingly associated with their cognitive, affective and motor distinctive features (Osório et al., 2014). In the same vein, the thalamus exhibits structural and functional differences with the neurotypical population, including disproportionately reduced volumes and decreased gray matter (Chiang et al., 2007; Campbell et al., 2009) and enhanced thalamic activity (Mobbs et al., 2007; Bódizs et al., 2012).

Nearly one third of the genes found downregulated in the blood of subjects with WS are candidates for dyslexia (*DOCK4*, *ZNF385D*, *CEP63*) and/or for SLI (*DOCK4*, *NFXL1*). As other members of the Dock family, *DOCK4* regulates cytoskeleton assembly, and cell adhesion and migration (Gadea and Blangy, 2014). Specifically, *DOCK4* has been shown to be involved in neuronal migration and neurite differentiation (Ueda et al., 2008; Xiao et al., 2013), via interaction with the actin-binding protein cortactin (Ueda et al., 2013). Knockdown of *Dock4* in mice abolishes commissural axon attraction by Shh (Makihara et al., 2018). The gene has been related to neuronal migration and neurite outgrowth anomalies linked to developmental dyslexia (Shao et al. 2016), although it is also associated with ASD (Pagnamenta et al., 2010) and SZ (Alkelai et al., 2012). GWAs have associated markers in *ZNF385D* to the co-occurrence of reading disability and language impairment (Eicher et al., 2013), but also to negative symptoms in SZ (Xu et al., 2013). *CEP63* is required for normal spindle assembly, being involved in maintaining centriole number and establishing the order of events in centriole formation (Brown et al., 2013). Besides its association with dyslexia (Einarsdottir et al., 2015), the gene is also a candidate for primary microcephaly (Marjanović et al., 2015), a feature that is commonly found in subjects with WS (Jernigan and Bellugi, 1990; Schmitt et al., 2001; Thompson et al., 2005; Jackowski et al., 2009). Finally, variants of *NFXL1*, which is predicted to encode a

transcription factor, confer a risk for SLI (Villanueva et al., 2015). The gene is highly expressed in the cerebellum (Nudel, 2016).

Regarding the candidates for language evolution that we have found downregulated in the blood of subjects with WS, *DUSP1* is involved in vocal learning in songbirds (Horita et al. 2010, Horita et al. 2012). *PVALB* encodes a calcium-binding protein that is structurally and functionally similar to calmodulin and that is involved in hippocampal plasticity, learning and memory (Donato et al., 2013). Interestingly enough, the inactivation of Pvalb-expressing interneurons in the auditory cortex alters response to sound, strengthening forward suppression and altering its frequency dependence (Phillips et al., 2017). Inhibition of PVALB-expressing GABAergic interneurons results in complex behavioral changes related to the behavioral phenotype observed in SZ (Brown et al., 2015). Importantly, some of the key changes that contributed to the emergence of our language-readiness involved GABAergic signaling (discussed in detail in Boeckx and Benítez-Burraco, 2014a), which are vital for oscillatory processes underlying language processing (Bae et al., 2010; see Murphy and Benítez-Burraco, 2018 for details). Reduction in *PVALB* expression in interneurons has been also found in mouse models of ASD (Filice et al., 2016), specifically, in the *Cntnap2*<sup>-/-</sup> model (Lauber et al., 2018). *CNTNAP2* is a direct target of FOXP2, the renowned “language gene” (Vernes et al., 2008; Adam et al., 2017) and regulates language development in non-pathological populations too (Whitehouse et al. 2011, Whalley et al. 2011, Kos et al. 2012). Also mice lacking *Plaur* have significantly fewer neocortical parvalbumin-containing GABAergic interneurons, this being associated with impaired social interactions (Bruneau and Szepetowski, 2011). *PLAUR* is a target of FOXP2 too (Roll et al. 2010), but also an effector of SRPX2, another of FOXP2’s targets (Royer-Zemmour et al. 2008) and a candidate for speech dyspraxia (Roll et al. 2006). Concerning PAX3, this gene is expressed in the neural crest and is a candidate for Waardenburg syndrome, a clinical condition entailing sensorineural hearing loss and developmental delay (Tassabehji et al., 1992; Chen et al., 2010). Finally, *ITGB4* encodes the integrin beta 4 subunit, a receptor for the laminins, including FLNA (Travis et al, 2004), an actin-binding protein needed for cytoskeleton remodeling and neuronal migration (Fox et al. 1998), which in turn binds one of the proteins bearing fixed changes in humans compared to extinct hominins (Pääbo, 2014, table S1).

Lastly, among the genes shown to be upregulated in the blood on WS subjects, we found the SLI candidate *SETBP1*, as well as *FGFR1* and *SIX3*. *SETBP1* is also a candidate for Schinzel-Giedion syndrome, a clinical condition entailing occasional epilepsy and severe developmental delay (Ko et al. 2013, Miyake et al. 2015). Mutations on this gene have been also associated to behavioral and social deficits (Coe et al. 2014). The Integrative Nuclear FGFR1 Signalling (INFS) has been hypothesized to be one of the neurodevelopmental pathways on which multiple SZ candidates converge, regulating numerous neurotransmitter systems and neural circuits (Stachowiak et al., 2013). Finally, *SIX3* contributes to regulate the relative size of the telencephalon versus the thalamus (Lavado et al. 2008, Sylvester et al. 2010). Interestingly, *Six3* regulates *Shh* (Jeong et al., 2008), one robust candidate for microcephaly that has been positively selected in the human lineage (Dorus et al. 2004), but also interacts with several genes relevant for our language-ready brain (Benítez-Burraco and Boeckx, 2015)

## Discussion

Deciphering the exact molecular causes of language dysfunction in WS is still pending. At present, none of the genes hemideleted in this condition has been demonstrated to play a central role in language processing. At the same time, hundreds of genes outside the WS critical region have been found to be dysregulated in subjects with this condition. In this paper we have shown that these genes are significantly enriched in core candidates for language disorders and language evolution, which emerge as robust candidates for language dysfunction in WS.

## Acknowledgements

This research was funded by the Spanish Ministry of Economy and Competitiveness (grant FFI2016-78034-C2-2-P [AEI/FEDER, UE] to ABB)

## References

- Adam I, Mendoza E, Kobalz U, Wohlgemuth S, Scharff C. (2017) CNTNAP2 is a direct FoxP2 target in vitro and in vivo in zebra finches: complex regulation by age and activity. *Genes Brain Behav.* 16(6):635-642.
- Alkelai A, Lupoli S, Greenbaum L, Kohn Y, Kanyas-Sarner K, Ben-Asher E, Lancet D, Macciardi F, Lerer B. (2012) DOCK4 and CEACAM21 as novel schizophrenia candidate genes in the Jewish population. *Int J Neuropsychopharmacol.* 15(4):459-69.
- Bae, M. H., Bissonette, G. B., Mars, W. M., Michalopoulos, G. K., Achim, C. L., Depireux, D. A., et al. (2010) Hepatocyte growth factor (HGF) modulates GABAergic inhibition and seizure susceptibility. *Exp Neurol.* 221: 129-35.
- Bellugi U, Lichtenberger L, Mills D, Galaburda A, Korenberg JR. (1999) Bridging cognition, the brain and molecular genetics: evidence from Williams syndrome. *Trends Neurosci.* 5:197-207.
- Benítez-Burraco A, Boeckx C (2015) Possible functional links among brain- and skull-related genes selected in modern humans. *Front Psychol* 6, 794.
- Benítez-Burraco, A. (2013) Genetics of language: Roots of specific language deficits. In *The Cambridge Handbook of Biolinguistics* (C. Boeckx and K. K. Grohmann, eds). Cambridge: Cambridge University Press, pp. 375-412.
- Benítez-Burraco, A., Murphy, E. (2016): The oscillopathic nature of language deficits in autism: from genes to language evolution. *Front. Hum. Neurosci.* 10, 120.
- Benjamini, Y., Hochberg, Y. (1995) Controlling the false discovery rate - a practical and powerful approach to multiple testing. *J R Stat Soc Series B* 57: 289–300.
- Bódizs R, Gombos F, Kovács I. (2012) Sleep EEG fingerprints reveal accelerated thalamocortical oscillatory dynamics in Williams syndrome. *Res Dev Disabil.* 33(1):153-64.
- Boeckx C, Benítez-Burraco A (2014a) The shape of the human language-ready brain. *Front Psychol* 5: 282.
- Boeckx C, Benítez-Burraco A (2014b) Globularity and language-readiness: generating new predictions by expanding the set of genes of interest. *Front Psychol* 5: 1324
- Brock J. (2007). Language abilities in Williams syndrome: a critical review. *Dev Psychopathol.* 19(1):97-127.
- Brown JA, Ramikie TS, Schmidt MJ, Báldi R, Garbett K, Everheart MG, Warren LE, Gellért L, Horváth S, Patel S, Mirnics K. (2015) Inhibition of parvalbumin-expressing interneurons results in complex behavioral changes. *Mol Psychiatry.* 20(12):1499-507.
- Brown NJ, Marjanović M, Lüders J, Stracker TH, Costanzo V. (2013) Cep63 and cep152 cooperate to ensure centriole duplication. *PLoS One* 8(7):e69986.



Bruneau N, Szepetowski P. (2011) The role of the urokinase receptor in epilepsy, in disorders of language, cognition, communication and behavior, and in the central nervous system. *Curr Pharm Des.* 17(19):1914-23.

Campbell LE, Daly E, Toal F, Stevens A, Azuma R, Karmiloff-Smith A, Murphy DG, Murphy KC. (2009) Brain structural differences associated with the behavioural phenotype in children with Williams syndrome. *Brain Res.* 1258:96-107. doi: 10.1016/j.brainres.2008.11.101. Epub 2008 Dec 11

Chen H, Jiang L, Xie Z, Mei L, He C, Hu Z, Xia K, Feng Y. (2010) Novel mutations of PAX3, MITF, and SOX10 genes in Chinese patients with type I or type II Waardenburg syndrome. *Biochem Biophys Res Commun.* 397(1):70-4.

Chen, E.Y., Tan, C.M., Kou, Y., Duan, Q., Wang, Z., Meirelles, G.V., Clark, N.R., Ma'ayan, A. (2013) Enrichr: interactive and collaborative HTML5 gene list enrichment analysis tool. *BMC Bioinformatics* 14: 128

Chen, X. S., Reader, R. H., Hoischen, A., Veltman, J. A., Simpson, N. H., SLI Consortium, et al. (2016) Next-generation sequencing identifies novel gene variants and pathways involved in specific language impairment. *Sci Rep.* 7: 46105.

Chiang MC, Reiss AL, Lee AD, Bellugi U, Galaburda AM, Korenberg JR, Mills DL, Toga AW, Thompson PM. (2007) 3D pattern of brain abnormalities in Williams syndrome visualized using tensor-based morphometry. *Neuroimage* 36(4):1096-109.

Coe BP, Witherspoon K, Rosenfeld JA, van Bon BW, Vulto-van Silfhout AT, Bosco P, Friend KL, Baker C, Buono S, Vissers LE, Schuurs-Hoeijmakers JH, Hoischen A, Pfundt R, Krumm N, Carvill GL, Li D, Amaral D, Brown N, Lockhart PJ, Scheffer IE, Alberti A, Shaw M, Pettinato R, Tervo R, de Leeuw N, Reijnders MR, Torchia BS, Peeters H, O'Roak BJ, Fichera M, Hehir-Kwa JY, Shendure J, Mefford HC, Haan E, Géczy J, de Vries BB, Romano C, Eichler EE. (2014) Refining analyses of copy number variation identifies specific genes associated with developmental delay. *Nat Genet.* 46(10):1063-71.

David, O., Maess, B., Eckstein, K., and Friederici, A. D. (2011) Dynamic causal modeling of subcortical connectivity of language. *J. Neurosci.* 31, 2712-2717.

Donato F, Rompani SB, Caroni P. (2013) Parvalbumin-expressing basket-cell network plasticity induced by experience regulates adult learning. *Nature* 504(7479):272-6.

Dorus S, Vallender EJ, Evans PD, Anderson JR, Gilbert SL, Mahowald M, Wyckoff GJ, Malcom CM, Lahn BT. (2004) Accelerated evolution of nervous system genes in the origin of Homo sapiens. *Cell* 119(7):1027-40.

Eicher JD, Powers NR, Miller LL, Akshoomoff N, Amaral DG, Bloss CS, Libiger O, Schork NJ, Darst BF, Casey BJ, Chang L, Ernst T, Frazier J, Kaufmann WE, Keating B, Kenet T, Kennedy D, Mostofsky S, Murray SS, Sowell ER, Bartsch H, Kuperman JM, Brown TT, Hagler DJ Jr, Dale AM, Jernigan TL, St Pourcain B, Davey Smith G, Ring SM, Gruen JR; Pediatric Imaging, Neurocognition, and Genetics Study. (2013) Genome-wide association study of shared components of reading disability and language impairment. *Genes Brain Behav.* 12(8):792-801.

Einarsdottir E, Svensson I, Darki F, Peyrard-Janvid M, Lindvall JM, Ameer A, Jacobsson C, Klingberg T, Kere J, Matsson H. (2015) Mutation in CEP63 co-segregating with developmental dyslexia in a Swedish family. *Hum Genet* 134(11-12):1239-48.

Fachim HA, Srisawat U, Dalton CF, Reynolds GP. (2018) Parvalbumin promoter hypermethylation in postmortem brain in schizophrenia. *Epigenomics* 10(5):519-524.

Filice F, Vörckel KJ, Sungur AÖ, Wöhr M, Schwaller B. (2016) Reduction in parvalbumin expression not loss of the parvalbumin-expressing GABA interneuron subpopulation in genetic parvalbumin and shank mouse models of autism. *Mol Brain*. 9:10.

Fisher SE. (2017) Evolution of language: Lessons from the genome. *Psychon Bull Rev*. 24(1):34-40.

Fox, J. W., Lamperti, E. D., Eksioglu, Y. Z., Hong, S. E., Feng, Y., Graham, D. A., et al. (1998). Mutations in filamin 1 prevent migration of cerebral cortical neurons in human periventricular heterotopia. *Neuron* 21, 1315-25.

Gadea G, Blangy A. (2014) Dock-family exchange factors in cell migration and disease. *Eur J Cell Biol*. 93(10-12):466-77.

Galaburda AM, Holinger DP, Bellugi U, Sherman GF. (2002) Williams Syndrome Neuronal Size and Neuronal-Packing Density in Primary Visual Cortex. *Arch Neurol*. 59(9):1461–1467.

Graham SA, Deriziotis P, Fisher SE. (2015) Insights into the genetic foundations of human communication. *Neuropsychol Rev*. 25(1):3-26.

Gray V, Karmiloff-Smith A, Funnell E, Tassabehji M. (2006) In-depth analysis of spatial cognition in Williams syndrome: A critical assessment of the role of the LIMK1 gene. *Neuropsychologia* 44(5):679-85.

Hoeft F, Dai L, Haas BW, Sheau K, Mimura M, Mills D, Galaburda A, Bellugi U, Korenberg JR, Reiss AL. (2014) Mapping genetically controlled neural circuits of social behavior and visuo-motor integration by a preliminary examination of atypical deletions with Williams syndrome. *PLoS One* 9(8):e104088.

Horita, H., Kobayashi, M., Liu, WC., Oka, K., Jarvis, E. D., and Wada, K. (2012). Specialized motor-driven *Dusp1* expression in the song systems of multiple lineages of vocal learning birds. *PLoS One* 7: e42173.

Horita, H., Wada, K., Rivas, M. V., Hara, E., and Jarvis, E. D (2010). The *dusp1* immediate early gene is regulated by natural stimuli predominantly in sensory input neurons. *J. Comp. Neurol*. 518, 2873–901

Howard ML, Palmer SJ, Taylor KM, Arthurson GJ, Spitzer MW, Du X, Pang TY, Renoir T, Hardeman EC, Hannan AJ. (2012) Mutation of *Gtf2ird1* from the Williams-Beuren syndrome critical region results in facial dysplasia, motor dysfunction, and altered vocalisations. *Neurobiol Dis*. 45(3):913-22.

Jackowski AP, Rando K, Maria de Araújo C, Del Cole CG, Silva I, Tavares de Lacerda AL. (2009) Brain abnormalities in Williams syndrome: a review of structural and functional magnetic resonance imaging findings. *Eur J Paediatr Neurol*. 13(4):305-16.

Jeong Y, Leskow FC, El-Jaick K, Roessler E, Muenke M, Yocum A, Dubourg C, Li X, Geng X, Oliver G, Epstein DJ. (2008) Regulation of a remote *Shh* forebrain enhancer by the *Six3* homeoprotein. *Nat Genet*. 40(11):1348-53.

Jernigan TL, Bellugi U. (1990). Anomalous brain morphology on magnetic resonance images in Williams syndrome and Down syndrome. *Arch Neurol*. 47(5):529-33.

Karmiloff-Smith A, Mills DL (2006). Williams Syndrome, in *Encyclopedia of Language and Linguistics* (K Brown, ed.), Oxford, Elsevier, Vol. 13, 585-589.

Kimura R, Swarup V, Tomiwa K, Gandal MJ, Parikshak NN, Funabiki Y, Nakata M, Awaya T, Kato T, Iida K, Okazaki S, Matsushima K, Kato T, Murai T, Heike T, Geschwind DH, Hagiwara M. (2018) Integrative network analysis reveals biological pathways associated with Williams syndrome. *J Child Psychol Psychiatry* doi: 10.1111/jcpp.12999.

Ko JM, Lim BC, Kim KJ, Hwang YS, Ryu HW, Lee JH, Kim JS, Chae JH. (2013) Distinct neurological features in a patient with Schinzel-Giedion syndrome caused by a recurrent SETBP1 mutation. *Childs Nerv Syst.* 29(4):525-9.

Korenberg JR, Chen XN, Hirota H, Lai Z, Bellugi U, Burian D, Roe B, Matsuoka R. VI. (2000). Genome structure and cognitive map of Williams syndrome. *J Cogn Neurosci.* 12 Suppl 1:89-107.

Kos, M., van den Brink, D., Snijders, T. M., Rijpkema, M., Franke, B., Fernandez, G., and Hagoort, P. (2012) CNTNAP2 and language processing in healthy individuals as measured with ERPs. *PLoS One* 7, e46995.

Kuleshov, M.V., Jones, M.R., Rouillard, A.D., Fernandez, N.F., Duan, Q., Wang, Z., Koplev, S., Jenkins, S.L., Jagodnik, K.M., Lachmann, A., McDermott, M.G., Monteiro, C.D., Gundersen, G.W., Ma'ayan, A. (2016) Enrichr: a comprehensive gene set enrichment analysis web server 2016 update. *Nucleic Acids Research.* 44(W1):W90-7

Lalli MA, Jang J, Park JH, Wang Y, Guzman E, Zhou H, Audouard M, Bridges D, Tovar KR, Papuc SM, Tutulan-Cunita AC, Huang Y, Budisteanu M, Arghir A, Kosik KS. (2016) Haploinsufficiency of BAZ1B contributes to Williams syndrome through transcriptional dysregulation of neurodevelopmental pathways. *Hum Mol Genet.* 25(7):1294-306.

Lauber E, Filice F, Schwaller B. (2018) Dysregulation of parvalbumin expression in the *Cntnap2*<sup>-/-</sup> mouse model of Autism Spectrum Disorder. *Front Mol Neurosci.* 11:262.

Lavado, A., Lagutin, O. V., Oliver, G. (2008). Six3 inactivation causes progressive caudalization and aberrant patterning of the mammalian diencephalon. *Development* 135: 441-50.

Levitin, D.J., Cole, K., Lincoln, A., Bellugi, U. (2005). Aversion, awareness, and attraction: investigating claims of hyperacusis in the Williams syndrome phenotype. *J. Child Psychol. Psychiatry* 46: 514–523.

Li N, Bartlett CW. (2012) Defining the genetic architecture of human developmental language impairment. *Life Sci.* 90(13-14):469-75.

Makihara S, Morin S, Ferent J, Côté JF, Yam PT, Charron F. (2018) Polarized Dock activity drives Shh-mediated axon guidance. *Dev Cell* 46(4):410-425.e7.

Malenfant P, Liu X, Hudson ML, Qiao Y, Hrynychak M, Riendeau N, Hildebrand MJ, Cohen IL, Chudley AE, Forster-Gibson C, Mickelson EC, Rajcan-Separovic E, Lewis ME, Holden JJ. (2012) Association of GTF2i in the Williams-Beuren syndrome critical region with autism spectrum disorders. *J Autism Dev Disord.* 42(7):1459-69.

Mariën P, Borgatti R. (2018) Language and the cerebellum. *Handb Clin Neurol.* 154:181-202.

Marjanović M, Sánchez-Huertas C, Terré B, Gómez R, Scheel JF, Pacheco S, Knobel PA, Martínez-Marchal A, Aivio S, Palenzuela L, Wolfrum U, McKinnon PJ, Suja JA, Roig I, Costanzo V, Lüders J, Stracker TH. (2015) CEP63 deficiency promotes p53-dependent microcephaly and reveals a role for the centrosome in meiotic recombination. *Nat Commun.* 6:7676.



Martens MA, Wilson SJ, Reutens DC. (2008). Research Review: Williams syndrome: acritical review of the cognitive, behavioral, and neuroanatomical phenotype. *J Child Psychol Psychiatry*. 49(6):576-608.

Mervis CB, Morris CA, Bertrand J, Robinson EF. (1999) Williams syndrome: Findings from an integrated program of research. In *Neurodevelopmental Disorders* (H Tager-Flusberg, ed),. Cambridge, MA: The MIT Press, pp. 65–110.

Mervis, C. B., Becerra, A. M. (2007) Language and communicative development in Williams syndrome. *Ment. Retard. Dev. Disabil. Res. Rev.* 13: 3 – 15.

Miyake F, Kuroda Y, Naruto T, Ohashi I, Takano K, Kurosawa K (2015) West syndrome in a patient with Schinzel-Giedion syndrome. *J Child Neurol*. 30(7):932-6.

Mobbs D, Eckert MA, Menon V, Mills D, Korenberg J, Galaburda AM, Rose FE, Bellugi U, Reiss AL. (2007) Reduced parietal and visual cortical activation during global processing in Williams syndrome. *Dev Med Child Neurol*. 2007 Jun;49(6):433-8.

Morris CA, Mervis CB, Hobart HH, Gregg RG, Bertrand J, Ensing GJ, Sommer A, Moore CA, Hopkin RJ, Spallone PA, Keating MT, Osborne L, Kimberley KW, Stock AD. (2003). GTF2I hemizygosity implicated in mental retardation in Williams syndrome: genotype-phenotype analysis of five families with deletions in the Williams syndrome region. *Am J Med Genet A*. 123A(1):45-59.

Murdoch, B. (2010). The cerebellum and language: Historical perspective and review. *Cortex* 46, 858-868.

Murphy E, Benítez-Burraco A (2018) Toward the language oscillogenome. *Front Psychol*. 9:1999.

Murphy E., Benítez-Burraco, A. (2016) Bridging the gap between genes and language deficits in schizophrenia: An oscillopathic approach. *Front. Hum. Neurosci*. 10: 422.

Murphy E., Benítez-Burraco, A. (2017) Language deficits in schizophrenia and autism as related oscillatory connectopathies: an evolutionary account. *Neurosci Biobehav Rev*. 83:742-764.

Nudel R. (2016) An investigation of NFXL1, a gene implicated in a study of specific language impairment. *J Neurodev Disord*.8:13.

Osório A, Soares JM, Prieto MF, Vasconcelos C, Fernandes C, Sousa S, Carracedo A, Gonçalves OF, Sampaio A. (2014) Cerebral and cerebellar MRI volumes in Williams syndrome. *Res Dev Disabil*. 35(4):922-8.

Pääbo, S. (2014). The human condition-a molecular approach. *Cell* 157, 216-26.

Pagnamenta AT, Bacchelli E, de Jonge MV, Mirza G, Scerri TS, Minopoli F, Chiocchetti A, Ludwig KU, Hoffmann P, Paracchini S, Lowy E, Harold DH, Chapman JA, Klauck SM, Poustka F, Houben RH, Staal WG, Ophoff RA, O'Donovan MC, Williams J, Nöthen MM, Schulte-Körne G, Deloukas P, Ragoussis J, Bailey AJ, Maestrini E, Monaco AP; International Molecular Genetic Study Of Autism Consortium. (2010) Characterization of a family with rare deletions in CNTNAP5 and DOCK4 suggests novel risk loci for autism and dyslexia. *Biol Psychiatry* 68(4):320-8.

Paracchini, S., Diaz, R., Stein, J. (2016) Advances in dyslexia genetics—new insights into the role of brain asymmetries, in *Advances in Genetics* 96 (T Friedmann, JC Dunlap, SF Goodwin, eds.), Academic Press: London, pp. 53–97.

Pettigrew, K.A., Frinton, E., Nudel, R., Chan, M.T., Thompson, P., Hayiou-Thomas, M.E., Talcott, J.B., Stein, J., Monaco, A.P., Hulme, C., Snowling, M.J., Newbury, D.F., Paracchini, S. (2016) Further evidence for a parent-of-origin effect at the NOP9 locus on language-related phenotypes. *J Neurodev Disord.* 8, 24.

Phillips EAK, Schreiner CE, Hasenstaub AR. (2017) Cortical interneurons differentially regulate the effects of acoustic context. *Cell Rep.* 20(4):771-778.

Pober BR, Wang E, Caprio S, Petersen KF, Brandt C, Stanley T, Osborne LR, Dzuria J, Gulanski B. (2010) High prevalence of diabetes and pre-diabetes in adults with Williams syndrome. *Am J Med Genet C Semin Med Genet.* 154C(2): 291-8.

Purser HR, Thomas MS, Snoxall S, Mareschal D, Karmiloff-Smith A. (2011). Definitions versus categorization: assessing the development of lexico-semantic knowledge in Williams syndrome. *Int J Lang Commun Disord.* 46(3):361-73.

Reilly, J., Klima, E.S., Bellugi, U. (1990) Once more with feeling: affect and language in atypical populations. *Dev. Psychopathol.* 2: 367–391.

Roll, P., Rudolf, G., Pereira, S., Royer, B., Scheffer, I. E., Massacrier, A., et al. (2006) SRPX2 mutations in disorders of language cortex and cognition. *Hum. Mol. Genet.* 15: 1195-207.

Roll, P., Vernes, S. C., Bruneau, N., Cillario, J., Ponsole-Lenfant, M., Massacrier, A., et al. (2010) Molecular networks implicated in speech-related disorders: FOXP2 regulates the SRPX2/uPAR complex. *Hum. Mol. Genet.* 19: 4848-60.

Royer-Zemmour, B., Ponsole-Lenfant, M., Gara, H., Roll, P., Lévêque, C., Massacrier, A., et al. (2008) Epileptic and developmental disorders of the speech cortex: ligand/receptor interaction of wild-type and mutant SRPX2 with the plasminogen activator receptor uPAR. *Hum. Mol. Genet.* 17: 3617-30.

Sakurai T, Dorr NP, Takahashi N, McInnes LA, Elder GA, Buxbaum JD. (2011) Haploinsufficiency of Gtf2i, a gene deleted in Williams Syndrome, leads to increases in social interactions. *Autism Res.* 4(1):28-39.

Scharff C, White SA. (2004) Genetic components of vocal learning. *Ann N Y Acad Sci.* 1016:325-47.

Schmitt JE, Eliez S, Bellugi U, Reiss AL. (2001) Analysis of cerebral shape in Williams syndrome. *Arch Neurol.* 58(2):283-7.

Shao S, Kong R, Zou L, Zhong R, Lou J, Zhou J, Guo S, Wang J, Zhang X, Zhang J, Song R. (2016) The roles of genes in the neuronal migration and neurite outgrowth network in developmental dyslexia: single- and multiple-risk genetic variants. *Mol Neurobiol.* 53(6):3967-3975.

Smith AD, Gilchrist ID, Hood B, Tassabehji M, Karmiloff-Smith A. (2009) Inefficient search of large-scale space in Williams syndrome: further insights on the role of LIMK1 deletion in deficits of spatial cognition. *Perception* 38(5):694-701.

Stachowiak MK, Kucinski A, Curl R, Syposs C, Yang Y, Narla S, Terranova C, Prokop D, Klejbor I, Bencherif M, Birkaya B, Corso T, Parikh A, Tzanakakis ES, Wersinger S, Stachowiak EK (2013): Schizophrenia: a neurodevelopmental disorder-integrative genomic hypothesis and therapeutic implications from a transgenic mouse model. *Schizophr Res* 143: 367-76.

Sylvester, J. B., Rich, C. A., Loh, Y. H., van Staaden, M. J., Fraser, G. J., and Streelman, J. T. (2010) Brain diversity evolves via differences in patterning. *Proc. Natl. Acad. Sci. U.S.A.* 107: 9718-23.

Tassabehji M, Hammond P, Karmiloff-Smith A, Thompson P, Thorgeirsson SS, Durkin ME, Popescu NC, Hutton T, Metcalfe K, Rucka A, Stewart H, Read AP, Maconochie M, Donnai D. (2005) GTF2IRD1 in craniofacial development of humans and mice. *Science* 310(5751):1184-7.

Tassabehji M, Read AP, Newton VE, Harris R, Balling R, Gruss P, Strachan T. (1992) Waardenburg's syndrome patients have mutations in the human homologue of the Pax-3 paired box gene. *Nature* 355(6361):635-6.

Thompson PM, Lee AD, Dutton RA, Geaga JA, Hayashi KM, Eckert MA, Bellugi U, Galaburda AM, Korenberg R, Mills DL, Toga AW, Reiss AL. (2005) Abnormal cortical complexity and thickness profiles mapped in Williams syndrome. *J Neurosci.*25(16):4146-58.

Todorovski Z, Asrar S, Liu J, Saw NM, Joshi K, Cortez MA, Snead OC rd, Xie W, Jia Z. (2015) LIMK1 regulates long-term memory and synaptic plasticity via the transcriptional factor CREB. *Mol Cell Biol.* 35(8):1316-28.

Travis, M. A., van der Flier, A., Kammerer, R. A., Mould, A. P., Sonnenberg, A., and Humphries, M. J (2004) Interaction of filamin A with the integrin beta 7 cytoplasmic domain: role of alternative splicing and phosphorylation. *FEBS Lett.* 569(1-3):185-90

Udwin, O., Yule, W. (1991) A cognitive and behavioural phenotype in Williams syndrome. *J. Clin. Exp. Neuropsychol.* 13, 232–244.

Ueda S, Fujimoto S, Hiramoto K, Negishi M, Katoh H. (2008) Dock4 regulates dendritic development in hippocampal neurons. *J Neurosci Res.* 86(14):3052-61.

Ueda S, Negishi M, Katoh H. (2013) Rac GEF Dock4 interacts with cortactin to regulate dendritic spine formation. *Mol Biol Cell* 24(10):1602-13.

Van Den Heuvel E, Manders E, Swillen A, Zink I. (2016). Developmental trajectories of structural and pragmatic language skills in school-aged children with Williams syndrome. *J Intellect Disabil Res.*60(10):903-19.

Vernes S.C., Newbury D.F., Abrahams B.S., Winchester L., Nicod J., Groszer M., Alarcón M., Oliver P.L., Davies K.E., Geschwind D.H. (2008) A functional genetic link between distinct developmental language disorders. *N. Engl. J. Med.* 359:2337

Vias C, Dick AS. (2017) Cerebellar contributions to language in typical and atypical development: a review. *Dev Neuropsychol.* 42(6):404-421.

Villanueva P, Nudel R, Hoischen A, Fernández MA, Simpson NH, Gilissen C, Reader RH, Jara L, Echeverry MM, Francks C, Baird G, Conti-Ramsden G, O'Hare A, Bolton PF, Hennessy ER; SLI Consortium, Palomino H, Carvajal-Carmona L, Veltman JA, Cazier JB, De Barbieri Z, Fisher SE, Newbury DF. (2015) Exome sequencing in an admixed isolated population indicates NFXL1 variants confer a risk for specific language impairment. *PLoS Genet.* 11(3):e1004925.

Volterra V, Capirci O, Pezzini G, Sabbadini L, Vicari S. (1996) Linguistic abilities in Italian children with Williams syndrome. *Cortex.* 32(4):663-77.

Wahl, M., Marzinzik, F., Friederici, A. D., Hahne, A., Kupsch, A., Schneider, G. H., Saddy, D., Curio, G., and Klostermann, F. (2008). The human thalamus processes syntactic and semantic language violations. *Neuron* 59, 695-707.

Watanabe Y, Honda S, Konishi A, Arakawa S, Murohashi M, Yamaguchi H, Torii S, Tanabe M, Tanaka S, Warabi E, Shimizu S. (2016) Autophagy controls centrosome number by degrading Cep63. *Nat Commun.* 7:13508.

Whalley, H. C., O'Connell, G., Sussmann, J. E., Peel, A., Stanfield, A. C., Hayiou-Thomas, M. E., Johnstone EC, Lawrie SM, McIntosh AM, Hall J. (2011) Genetic variation in CNTNAP2 alters brain function during linguistic processing in healthy individuals. *Am. J. Med. Genet. B Neuropsychiatr. Genet.* 156B: 941-8.

Whitehouse, A. J., Bishop, D. V., Ang, Q. W., Pennell, C. E., Fisher, S. E. (2011) CNTNAP2 variants affect early language development in the general population. *Genes Brain Behav.* 10, 451-6.

Xiao Y, Peng Y, Wan J, Tang G, Chen Y, Tang J, Ye WC, Ip NY, Shi L. (2013) The atypical guanine nucleotide exchange factor Dock4 regulates neurite differentiation through modulation of Rac1 GTPase and actin dynamics. *J Biol Chem.* 288(27):20034-45.

Xu C, Aragam N, Li X, Villa EC, Wang L, Briones D, Petty L, Posada Y, Arana TB, Cruz G, Mao C, Camarillo C, Su BB, Escamilla MA, Wang K. (2013) BCL9 and C9orf5 are associated with negative symptoms in schizophrenia: meta-analysis of two genome-wide association studies. *PLoS One* 8(1):e51674.
