# Supplementary material for: Robust candidates for language development and evolution are significantly dysregulated in the blood of people with Williams syndrome
Source: bioRxiv preprint, doi:10.1101/488155, version 1 (2018-12-06)
Supplement: Supplementary file 1 [file 488155_file02.xlsx]

## Sheet: CEP63
Brain expression profile of the gene across development according to the Human Brain Transcriptome Database (http://hbatlas.org/).
Six different brain regions are considered: the cerebellar cortex (CBC), the mediodorsal nucleus of the thalamus (MD), the striatum (STR), the amygdala (AMY), the hippocampus (HIP) and 11 areas of neocortex (NCX).

## Sheet: DOCK4
Brain expression profile of the gene across development according to the Human Brain Transcriptome Database (http://hbatlas.org/).
Six different brain regions are considered: the cerebellar cortex (CBC), the mediodorsal nucleus of the thalamus (MD), the striatum (STR), the amygdala (AMY), the hippocampus (HIP) and 11 areas of neocortex (NCX).

## Sheet: DUSP1
Brain expression profile of the gene across development according to the Human Brain Transcriptome Database (http://hbatlas.org/).
Six different brain regions are considered: the cerebellar cortex (CBC), the mediodorsal nucleus of the thalamus (MD), the striatum (STR), the amygdala (AMY), the hippocampus (HIP) and 11 areas of neocortex (NCX).

## Sheet: FGFR1
Brain expression profile of the gene across development according to the Human Brain Transcriptome Database (http://hbatlas.org/).
Six different brain regions are considered: the cerebellar cortex (CBC), the mediodorsal nucleus of the thalamus (MD), the striatum (STR), the amygdala (AMY), the hippocampus (HIP) and 11 areas of neocortex (NCX).

## Sheet: ITGB4
Brain expression profile of the gene across development according to the Human Brain Transcriptome Database (http://hbatlas.org/).
Six different brain regions are considered: the cerebellar cortex (CBC), the mediodorsal nucleus of the thalamus (MD), the striatum (STR), the amygdala (AMY), the hippocampus (HIP) and 11 areas of neocortex (NCX).

## Sheet: NFXL1
Brain expression profile of the gene across development according to the Human Brain Transcriptome Database (http://hbatlas.org/).
Six different brain regions are considered: the cerebellar cortex (CBC), the mediodorsal nucleus of the thalamus (MD), the striatum (STR), the amygdala (AMY), the hippocampus (HIP) and 11 areas of neocortex (NCX).

## Sheet: PAX3
Brain expression profile of the gene across development according to the Human Brain Transcriptome Database (http://hbatlas.org/).
Six different brain regions are considered: the cerebellar cortex (CBC), the mediodorsal nucleus of the thalamus (MD), the striatum (STR), the amygdala (AMY), the hippocampus (HIP) and 11 areas of neocortex (NCX).

## Sheet: PLAUR
Brain expression profile of the gene across development according to the Human Brain Transcriptome Database (http://hbatlas.org/).
Six different brain regions are considered: the cerebellar cortex (CBC), the mediodorsal nucleus of the thalamus (MD), the striatum (STR), the amygdala (AMY), the hippocampus (HIP) and 11 areas of neocortex (NCX).

## Sheet: SETBP1
Brain expression profile of the gene across development according to the Human Brain Transcriptome Database (http://hbatlas.org/).
Six different brain regions are considered: the cerebellar cortex (CBC), the mediodorsal nucleus of the thalamus (MD), the striatum (STR), the amygdala (AMY), the hippocampus (HIP) and 11 areas of neocortex (NCX).

## Sheet: SIX3
Brain expression profile of the gene across development according to the Human Brain Transcriptome Database (http://hbatlas.org/).
Six different brain regions are considered: the cerebellar cortex (CBC), the mediodorsal nucleus of the thalamus (MD), the striatum (STR), the amygdala (AMY), the hippocampus (HIP) and 11 areas of neocortex (NCX).

[truncated: 1 more sheets: ZNF385D]
